# Supplementary material
Source: PubMed Central journal article supplement (PMC7643754)
Supplement: NIHMS1641602-supplement-1.pdf [file NIHMS1641602-supplement-1.pdf]

## Supplementary information

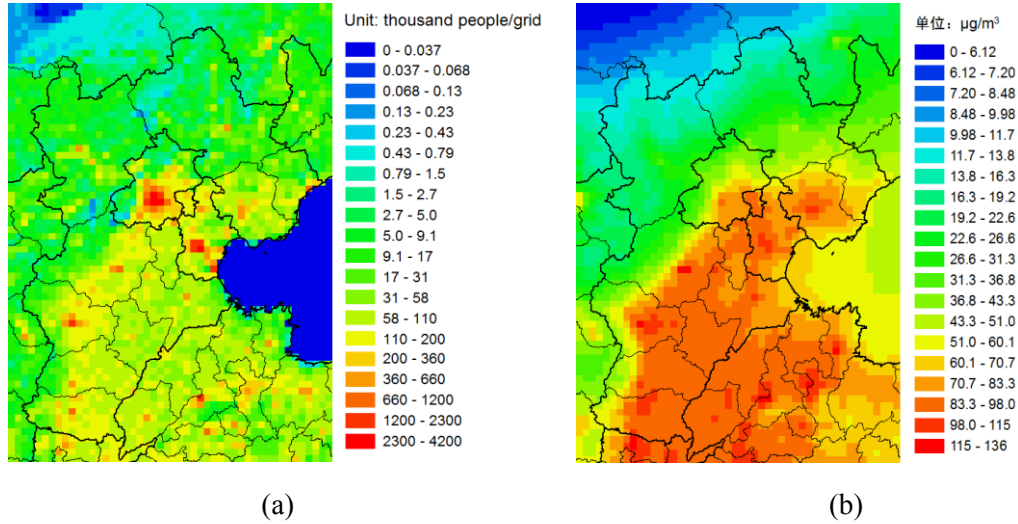

Fig. S1 Spatial distribution of population (a) and annual average PM<sub>2.5</sub> concentrations (b) in 2014 in the BTH region (with a grid resolution of 12 km×12 km).

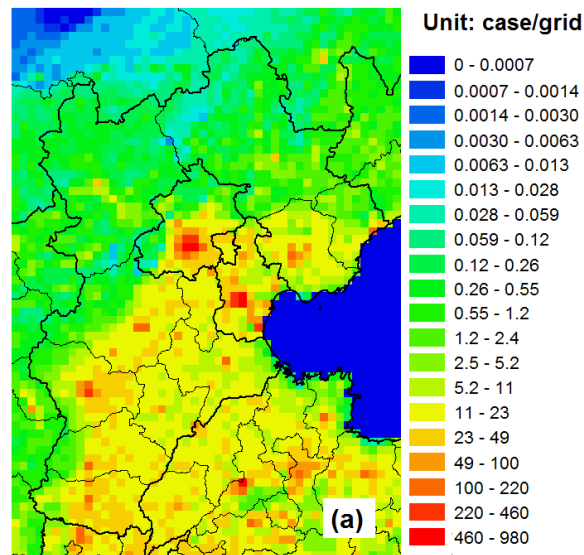

Fig. S2 Spatial distribution of all-cause mortality due to short-term exposure to PM<sub>2.5</sub> in the BTH region.

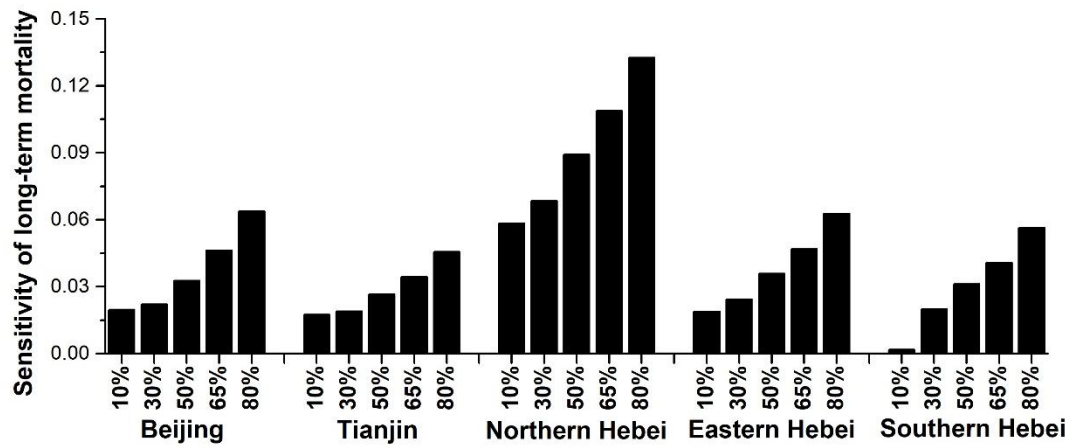

Fig. S3 Sensitivity of annual mean mortality due to long-term exposure to  $PM_{2.5}$  to stepped control of  $NO_x$  emissions in the whole China. The X-axis shows the reduction ratio ( $= 1 - \text{emission ratio}$ ). The Y-axis shows the sensitivity of health effect, as defined by Eq. 3.
